# Supplementary material for: Inferring Strain Mixture within Clinical Plasmodium falciparum Isolates from Genomic Sequence Data
Source: PubMed Central journal article supplement (PMC4928962; doi:10.1371/journal.pcbi.1004824), 2016-06-30
Supplement: pcbi.1004824.s001.pdf [file pcbi.1004824.s001.pdf]

| Actual      | Inferred    | $\alpha$ | Actual      | Inferred    | $\alpha$ |
|-------------|-------------|----------|-------------|-------------|----------|
| (0,1)       | (0,1)       | 1.9e-5   | (0.5,0.5)   | (0.52,0.48) | 1.3e-5   |
| (0.01,0.99) | (0.01,0.99) | 5.3e-5   | (0.6,0.4)   | (0.63,0.38) | 2.4e-5   |
| (0.05,0.95) | (0.03,0.97) | 1.9e-5   | (0.7,0.3)   | (0.72,0.28) | 4.7e-6   |
| (0.1,0.9)   | (0.09,0.81) | 1.4e-5   | (0.75,0.25) | (0.72,0.28) | 5.1e-4   |
| (0.15,0.85) | (0.14,0.86) | 1.5e-3   | (0.8,0.2)   | (0.77,0.23) | 3.7e-6   |
| (0.2,0.8)   | (0.20,0.80) | 1.0e-5   | (0.85,0.15) | (0.88,0.12) | 9.1e-4   |
| (0.25,0.75) | (0.25,0.75) | 1.0e-5   | (0.9,0.1)   | (0.90,0.10) | 1.2e-5   |
| (0.3,0.7)   | (0.33,0.67) | 2.8e-5   | (0.95,0.05) | (0.97,0.03) | 5.2e-6   |
| (0.4,0.6)   | (0.41,0.59) | 1.2e-5   | (0.99,0.01) | (0.99,0.01) | 6.1e-5   |

**Table S1.** Table of output values from algorithm applied to artificial laboratory mixture data.
