# Supplementary material for: Inferring Strain Mixture within Clinical Plasmodium falciparum Isolates from Genomic Sequence Data
Source: PubMed Central journal article supplement (PMC4928962; doi:10.1371/journal.pcbi.1004824), 2016-06-30

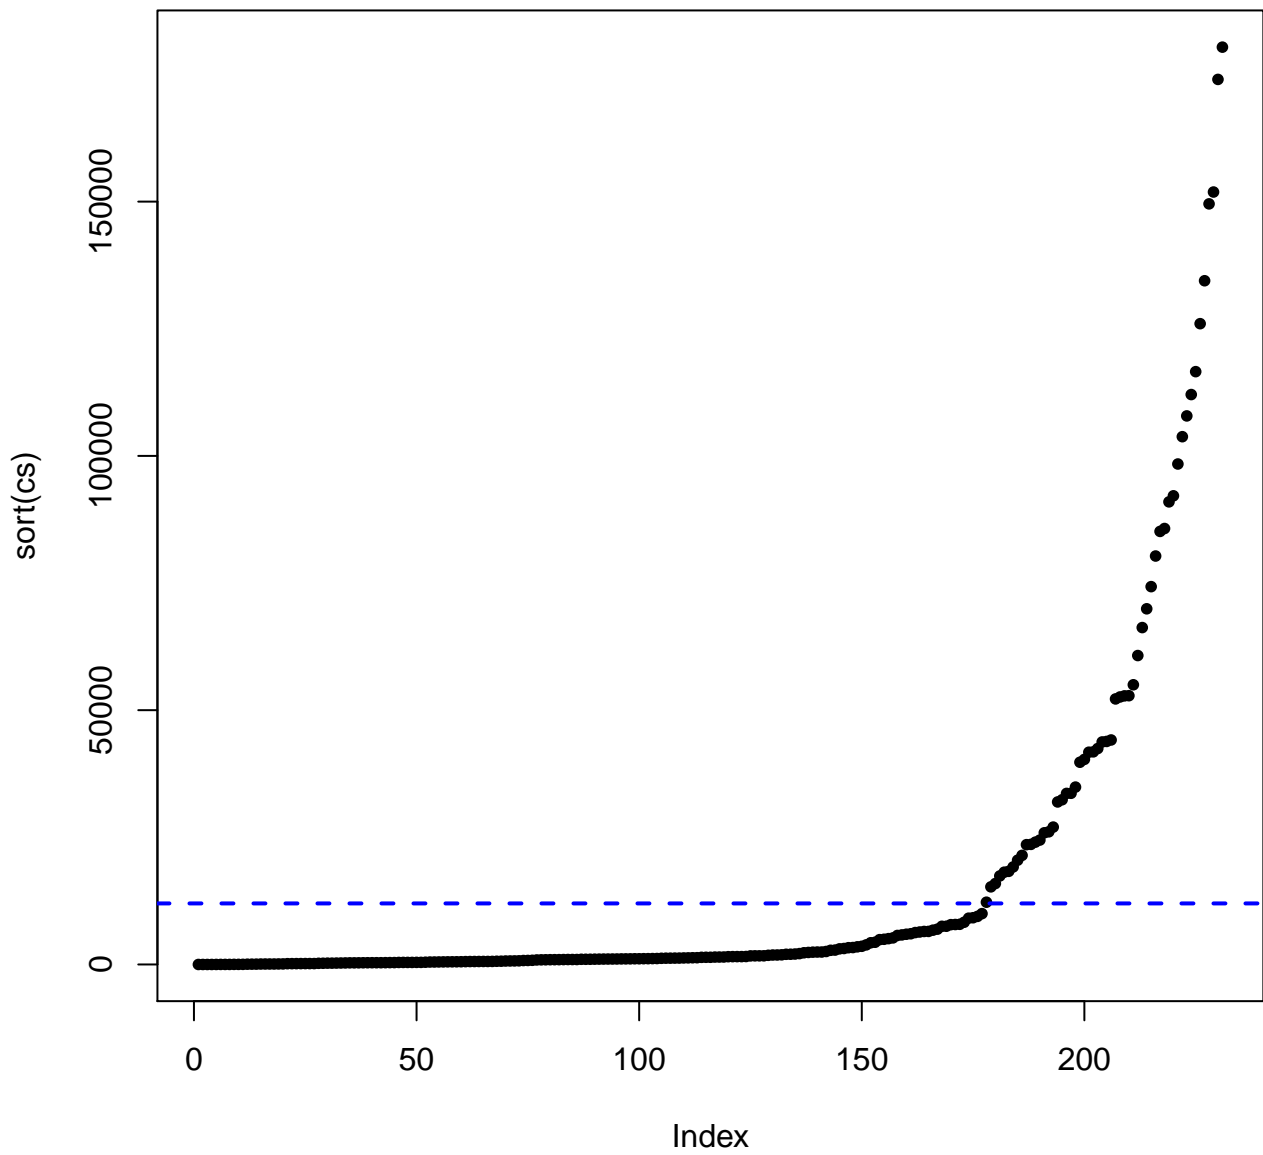

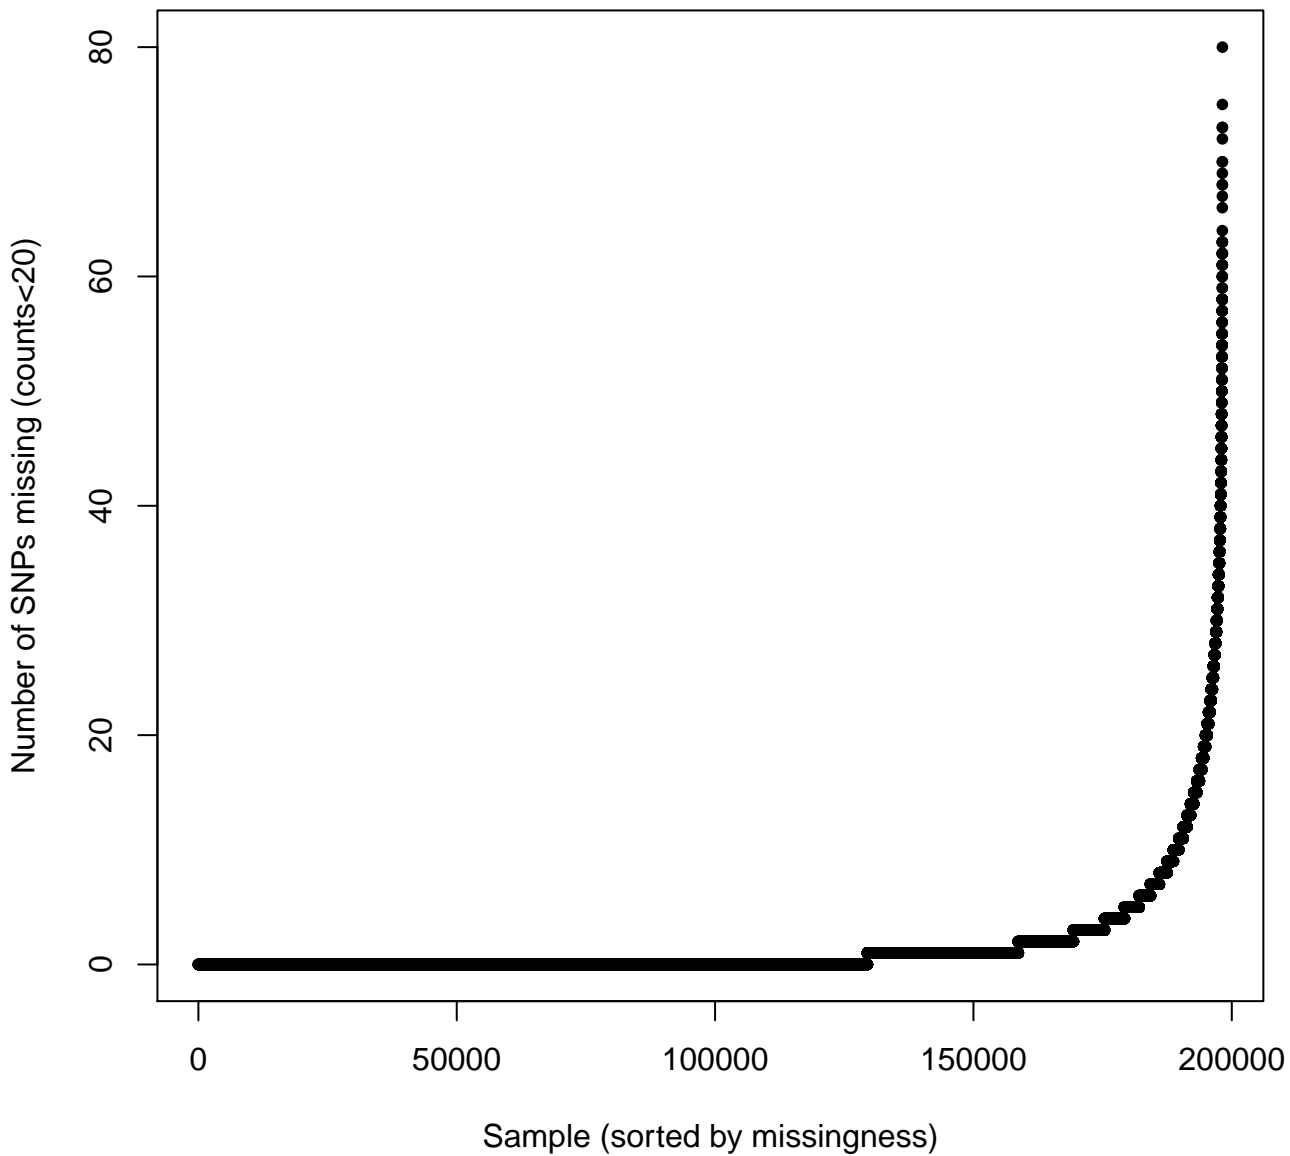

Supplement: pcbi.1004824.s003.pdf [file pcbi.1004824.s003.pdf]
